# Supplementary material for: Features of the Preparation and Luminescence of Langmuir-Blodgett Films Based on the Tb(III) Complex with 3-Methyl-1-phenyl-4-stearoylpyrazol-5-one and 2,2′-Bipyridine
Source: MDPI journal article supplement (doi:10.3390/ma15031127), 2022-01-31

# Features of the Preparation and Luminescence of Langmuir-Blodgett Films Based on the Tb(III) Complex with 3-Methyl-1-Phenyl-4-Stearoylpyrazol-5-One and 2,2'-Bipyridine

Julia Devterova <sup>1</sup>, Kirill Kirillov <sup>2</sup>, Anton Nikolaev <sup>1</sup>, Michail Sokolov <sup>2</sup>, Victor Shul'gin <sup>3</sup>, Alexey Gusev <sup>3</sup>, Victor Panyushkin <sup>1</sup> and Wolfgang Linert <sup>4,\*</sup>

<sup>1</sup> Department of Chemistry and High Technology, Kuban State University, 350040 Krasnodar, Russia; devterova8julia@gmail.com (J.D.); map\_kompass@mail.ru (A.N.); panyushkin@chem.kubsu.ru (V.P.)

<sup>2</sup> Department of Physics and Technics, Kuban State University, 350040 Krasnodar, Russia; kirillka.kir@bk.ru (K.K.); sokolovme@mail.ru (M.S.)

<sup>3</sup> Institute of Biochemical Technology, Ecology and Pharmacy, V.I. Vernadsky Crimean Federal University, 295007 Simferopol, Russia; shulvic@gmail.com (V.S.); galex0330@gmail.com (A.G.)

<sup>4</sup> Institute of Applied Synthetic Chemistry, Vienna University of Technology, A-1060 Vienna, Austria

\* Correspondence: wolfgang.linert@tuwien.ac.at; Tel.: +43-(1)-58801-163613

## Figures

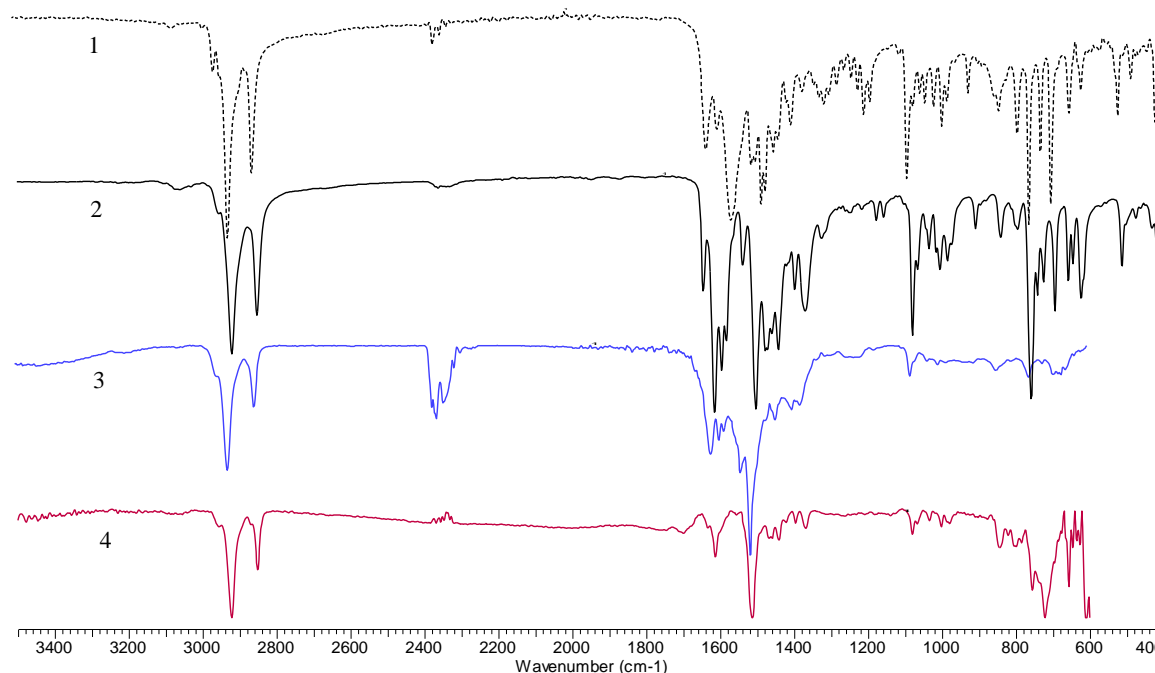

**Figure S1.** IR spectra of 1) HL (powder), 2) TbL<sub>3</sub>·bipy (powder), 3) 10-layer TbL<sub>3</sub>·bipy-based LBF obtained on subphase with C(Tb<sup>3+</sup>) = 5·10<sup>−4</sup> M, 4) 10-layer TbL<sub>3</sub>·bipy-based LBF obtained on subphase without terbium ions, C(Tb<sup>3+</sup>) = 0.0 M.

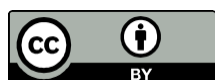

Supplement: s1 [file s1]
